# Supplementary material
Source: PubMed Central journal article supplement (PMC1890031)
Supplement: NIHMS17446-supplement-supplement_1.pdf [file NIHMS17446-supplement-supplement_1.pdf]

## Extended Methods

The Luo-Rudy (LRd) model of the cardiac ventricular action potential<sup>1</sup> was used to investigate the pacemaking mechanism in BP cells. The following protocol was simulated: After 10 minutes at rest (to achieve steady-state),  $I_{K1}$  suppression (81% and 100%) was simulated by adjusting the channel conductance. Simulated transmembrane currents were observed during initial transitory oscillations of membrane potential,  $V_m$ , and during the stable oscillatory steady-state. Pacemaker cycle-length (CL) was computed as the interval between peaks of neighboring APs. Calcium transients were generated by the calcium-induced calcium-release (CICR) process, where calcium entry starting at the AP upstroke  $(dV_m/dt)_{max}$  provided the trigger for  $Ca^{2+}$  release from the sarcoplasmic reticulum (SR). The effects of  $\beta$ AS were simulated based on experimental observations<sup>2</sup>. They include: shifting  $I_{Na}$  fast inactivation in the hyperpolarizing direction  $(-3.4 \text{ mV})^{2,3}$ , increasing  $I_{Ks}$  conductance (60%)<sup>4</sup>, increasing the rate of  $I_{NaK}$  (20%)<sup>2</sup> and increasing  $I_{Ca,L}$  (300%). The rate of  $[Ca^{2+}]_i$  uptake into the network SR,  $I_{up}$ , was also increased (110%) to account for a 40% increase in the rate of decline of  $[Ca^{2+}]_i$ . The sensitivity of BP pacemaking rate to these changes was tested at various expression levels of  $I_{NaCa}$  (control<sup>1</sup> and 100% increase).

1. Luo CH, Rudy Y. A dynamic model of the cardiac ventricular action potential. I. Simulations of ionic currents and concentration changes. *Circulation Research*. 1994;74:1071-96.
2. Zeng J, Rudy Y. Early afterdepolarizations in cardiac myocytes: mechanism and rate dependence. *Biophysical Journal*. 1995;68:949-64.
3. Ono K, Kiyosue T, Arita M. Isoproterenol, DBcAMP, and forskolin inhibit cardiac sodium current. *American Journal of Physiology*. 1989;256:C1131-7.
4. Sanguinetti MC, Jurkiewicz NK, Scott A, Siegl PK. Isoproterenol antagonizes prolongation of refractory period by the class III antiarrhythmic agent E-4031 in guinea pig myocytes. Mechanism of action. *Circulation Research*. 1991;68:77-84.
